# Supplementary material
Source: PubMed Central journal article supplement (PMC5593316)
Supplement: NIHMS897356-supplement-Table.pdf [file NIHMS897356-supplement-Table.pdf]

11206\_008 Jurkat-MainLib -----ATATC-TGCGCTACTTGAATCGGGAGACTCGCCTGGAGCGTCCGAG-----  
710084\_008 Jurkat-MainLib -----ATATC-TGCGCTACTTGAATCGGGAGACTCGCCTGGAGCGTCCGAG-----  
710999\_042 Jurkat-MainLib -----GGAAACATGCAGTGTCTCTGGGAGACCGGAGATTC--TCGATGCA-----  
709748\_042 Jurkat-MainLib -----GGAAACATGCAGTGTCTCTGGGAGACCGGAGATTC--TCGATGCA-----  
711139\_030 Jurkat-MainLib -----AGGAAAACTTCTGACCGAGAGTCTAGACTTCAGAATATGGCCGG-----  
710019\_030 Jurkat-MainLib -----AGGAAAACTTCTGACCGAGAGTCTAGACTTCAGAATATGGCCGG-----  
708228\_039 Jurkat-MainLib -----GGCTCAAACCCGTCTGAAGTCTTGACCTGGATTATGAATCCGCC-----  
711274\_039 Jurkat-MainLib -----GGCTCAAACCCGTCTGAAGTCTTGACCTGGATTATGAATCCGCC-----  
711218\_007 Jurkat-MainLib -----GCAGAAAGACTCCTTTTTCGAAGATCGCAAAC-GGCAGCGTT-TCCTG-----  
710096\_007 Jurkat-MainLib -----GCAGAAAGACTCCTTTTTCGAAGATCGCAAAC-GGCAGCGTT-TCCTG-----  
711232\_014 Jurkat-MainLib -----TTCTAAGTCCGTCTTTACTTAC-TGTTAAACTGGCAGCCTAGTCTCT-----  
710110\_014 Jurkat-MainLib -----TTGTAAGTCCGTCTTTACTTACCTGGTAAACGGGCAGCCTAGTCTCT-----  
711245\_021 Jurkat-MainLib -----GTCTCGTCTGCTTGCTACGAAAGTTACTCTATACTGTCAATGGA-----  
710123\_021 Jurkat-MainLib -----GTCTCGTCTGCTTGCTACGAAAGTTACTCTATACTGTCAATGGA-----  
708293\_009 Jurkat-MainLib -----GCCTTCGTAACGCAAGGAAGTTTTCCCTGTATAGTAGACGGCCCTC-----  
711339\_009 Jurkat-MainLib -----GCCTTCGTAACGCAAGGAAGTTTTCCCTGTATAGTAGACGGCCCTC-----  
711160\_012 Jurkat-ComLib -----GTTAAG-GTTCCTCTTA--AGTCTTGTAGTATATCGGATCAGAGCCG-----  
710040\_012 Jurkat-ComLib -----GTTAAG-GTTCCTCTTA--AGTCTTGTAGTATATCGGATCAGAGCCG-----  
710130\_045 Jurkat-MainLib -----GAAATCTAAGCGATCTCTAA--GAAGTTACTATTAT-----  
709715\_004 Jurkat-MainLib -----TCTCGAACTGTTAATGTTATAA--GGTCTTAACTGGTATAATGCTG-----  
710966\_004 Jurkat-MainLib -----TCTCGAACTGTTAATGTTATAA--GGTCTTAACTGGTATAATGCTG-----  
711149\_021 Jurkat-ComLib -----ATAAGCCTCCTGAAATCGTA--GCTCTGAATGTTAAGTTATCAGGTC-----  
710029\_021 Jurkat-ComLib -----ATAAGCCTCCTGAAATCGTA--GCTCTGAATGTTAAGTTATCAGGTC-----  
709693\_014 Jurkat-MainLib -----TGGCCGCCCGGTGATATC--GATCCTATGAGCGCGAACAATCCCTCG-----  
710944\_014 Jurkat-MainLib -----TGGCCGCCCGGTGATATC--GATCCTATGAGCGCGAACAATCCCTCG-----  
711125\_023 Jurkat-ComLib -----TTCTATGGGTCTATCATATCAGAC--AATCTTAAACGTCACAAT-----  
710005\_023 Jurkat-ComLib -----TTCTATGGGTCTATCATATCAGAC--AATCTTAAACGTCACAAT-----  
711151\_029 Jurkat-MainLib -----GTGTATGGCTACTATGAAGTATAACTTGATTG--AGCTGTCAATCGA-----  
710031\_029 Jurkat-MainLib -----GTGTATGGCTACTATGAAGTATAACTTGATTG--AGCTGTCAATCGA-----  
708290\_042 Jurkat-ComLib -----GACACAGCGAACCTTTATCTGGATCCTGACTTTCCATCGATGCCG-----  
711336\_042 Jurkat-ComLib -----GACACAGCGAACCTTTATCTGGATCCTGACTTTCCATCGATGCCG-----  
710041\_020 Jurkat-ComLib -----GACACAGCGAACCTTTATCTGGATCCTGACTTTCCATCGATGCCG-----  
711161\_020 Jurkat-ComLib -----GACACAGCGAACCTTTATCTGGATCCTGACTTTCCATCGATGCCG-----  
711208\_016 Jurkat-MainLib -----GCATTAAGTAGTATCCGAGTATACTCGAATGTTATATAGTGTATA-----  
710086\_016 Jurkat-MainLib -----GCATTAAGTAGTATCCGAGTATACTCGAATGTTATATAGTGTATA-----  
708265\_044 Jurkat-MainLib -----TTACCAATTATATATTACAATAGTTGAGTAGTTCAAACTTTACTAG-----  
711311\_044 Jurkat-MainLib -----TTACCAATTATATATTACAATAGTTGAGTAGTTCAAACTTTACTAG-----  
711033\_039 Jurkat-ComLib -----TAAAAATGTGTTATCACACACTAGTTGATTTTTTTAA-C TTCAGTAT-----  
709782\_039 Jurkat-ComLib -----TAAAAATGTGTTATCACACACTAGTTGATTTTTTTAA-C TTCAGTAT-----  
708282\_010 Jurkat-MainLib -----TGTAACCACTATGCTCACGTTTTTAATTACAATCCCAGTGCTAC-----  
711328\_010 Jurkat-MainLib -----TGTAACCACTATGCTCACGTTTTTAATTACAATCCCAGTGCTAC-----  
711211\_032 Jurkat-MainLib -----GATACAACCTAATATGAGTATCTTTTCGTTAGGCTAATCGGCTGC-----  
710089\_032 Jurkat-MainLib -----GATACAACCTAATATGAGTATCTTTTCGTTAGGCTAATCGGCTGC-----  
711136\_014 Jurkat-ComLib -----TCCTGCCAATTTCAAATTTAAACGATAAAATAA-ATCCCTTTCAAG-----  
710016\_014 Jurkat-ComLib -----TCCTGCCAATTTCAAATTTAAACGATAAAATAA-ATCCCTTTCAAG-----  
711182\_002 Jurkat-ComLib -----AATACAAAGTATAATCTAATACAGA-ATTTCTCGCAAAAATAGACAT-----  
710062\_002 Jurkat-ComLib -----AATACAAAGTATAATCTAATACAGA-ATTTCTCGCAAAAATAGACAT-----  
708270\_011 Jurkat-MainLib -----CTCGGGAGGGGAAAAATACGTTCCCTTTTTGTTTTAGCATTAGTAG-----  
1.....10.....20.....30.....40.....50.....60.....70.....80.....90....

```

711316 011 Jurkat-MainLib -----CTCGGGAAGCGAAAATACATTCCCTTTTGTGTTAGCATTCCAGTAG
711194 001 Jurkat-ComLib -----GAGCTCTCGATGAATACACACATTTACTATT--TTTAGCTGTTGAGG
710074 001 Jurkat-ComLib -----GAGCTCTCGATGAATACACACATTTACTATT--TTTAGCTGTTGAGG
711235 030 Jurkat-MainLib -----ACGTTGCGCACGTTTGGTTCCTATGTATACCCCTACTGACGTTAT
710113 030 Jurkat-MainLib -----ACGTTGCGCACGTTTGGTTCCTATGTATACCCCTACTGACGTTAT
709728 011 Jurkat-MainLib -----TCCAGGTGTAATTTAAATATATACGCTTCTGCTTAACTGTCGG
710979 011 Jurkat-MainLib -----TCCAGGTGTAATTTAAATATATACGCTTCTGCTTAACTGTCGG
709680 015 Jurkat-MainLib -----CAAAGCTCTGAACCTAGAATCACCTGCTATGCGGAATGAATATTC
710931 015 Jurkat-MainLib -----CAAAGCTCTGAACCTAGAATCACCTGCTATGCGGAATGAATATTC
711024 048 Jurkat-ComLib -----CATTGCTCTGA--TGGGATAAAATGCAATCGCAATGGCAGGT
711055 029 Jurkat-ComLib -----ACTCGTAATACTTCTTCAATTATCATG-CCTATAGGAATCCACTGC
709804 029 Jurkat-ComLib -----ACTCGTAATACTTCTTCAATTATCATG-CCTATAGGAATCCACTGC
711186 018 Jurkat-ComLib -----ATTCTAATTAATAAT-TTTTTCTCTGTCACTTGCCATGCGCGGAA
710066 018 Jurkat-ComLib -----ATTCTAATTAATAAT-TTTTTCTCTGTCACTTGCCATGCGCGGAA
711219 015 Jurkat-MainLib -----TCATTTTAAGGTCCTCTTAAACATGATCATTACCGTTGTTATGTAG
710097 015 Jurkat-MainLib -----TCATTTTAAGGTCCTCTTAAACATGATCATTACCGTTGTTATGTAG
711198 017 Jurkat-ComLib -----TTGGTATCTGGGCCTTGTAATATGGCCTAGTACGGCTTAGGTAG
710078 017 Jurkat-ComLib -----TTGGTATCTGGGCCTTGTAATATGGCCTAGTACGGCTTAGGTAG
709678 007 Jurkat-MainLib -----GTATGAAGGCTTGTG-TTTTCTAG-TGGTTTTATGTAATTACTAC
710929 007 Jurkat-MainLib -----GTATGAAGGCTTGTG-TTTTCTAG-TGGTTTTATGTAATTACTAC
711080 027 Jurkat-ComLib -----TAGGTTACAGCAGGCTGTGTACTTTTATAGCTGCTTGTACTGTGAA
711159 012 Jurkat-ComLib -----TAGGTTACAGCAGGCTGTGTACTTTTATAGCTGCTTGTACTGTGAA
709829 027 Jurkat-ComLib -----TAGGTTACAGCAGGCTGTGTACTTTTATAGCTGCTTGTACTGTGAA
710039 012 Jurkat-ComLib -----TAGGTTACAGCAGGCTGTGTACTTTTATAGCTGCTTGTACTGTGAA
708258 012 Jurkat-MainLib -----TTGCGGCCTCAAGGAGGAGTGGCTTATATTTACGCTGCTCGAGC
711304 012 Jurkat-MainLib -----TTGCGGCCTCAAGGAGGAGTGGCTTATATTTACGCTGCTCGAGC
711145 005 Jurkat-ComLib -----TTGCTAGGCAGAGTATAATCTAATT-CGCCGTATTTAGCTGACAGG
710025 005 Jurkat-ComLib -----TTGCTAGGCAGAGTATAATCTAATT-CGCCGTATTTAGCTGACAGG
709683 023 Jurkat-MainLib -----GGGCTGCTGGGCTAATCGGTACTTATTCTACTCGGAACGTGCGTT
710934 023 Jurkat-MainLib -----GGGCTGCTGGGCTAATCGGTACTTATTCTACTCGGAACGTGCGTT
711158 004 Jurkat-ComLib -----GTCATTAGGCCATTCAATAAGTAAAGCATCTCGTAATGTAAGAA
711168 044 Jurkat-MainLib -----CGGGTAGTAGG-TAGTCGGAACGTATTCTTATCCTAATTTCCAAGA
710048 044 Jurkat-MainLib -----CGGGTAGTAGG-TAGTCGGAACGTATTCTTATCCTAATTTCCAAGA
710938 039 Jurkat-MainLib -----GATTTCTTACGAAACTTTTCAAACTACTAGTTGTAATGTTAT
709687 039 Jurkat-MainLib -----GATTTCTTACGAAACTTTTCAAACTACTAGTTGTAATGTTAT
710976 044 Jurkat-MainLib -----CGCGATAAGCCAGCGTTGACTTCTACCAAGAAGCTTCAAGTACGG
709725 044 Jurkat-MainLib -----CGCGATAAGCCAGCGTTGACTTCTACCAAGAAGCTTCAAGTACGG
711059 045 Jurkat-ComLib -----TCTCCCCGTTGAGTCGGGGTTATCCTATTA---GCTTCAACTCA
709808 045 Jurkat-ComLib -----TCTCCCCGTTGAGTCGGGGTTATCCTATTA---GCTTCAACTCA
711148 013 Jurkat-ComLib -----TATTTAATTTGCGATATCTTCTTATGCTGCCTTAACATCTACTT
710028 013 Jurkat-ComLib -----TATTTAATTTGCGATATCTTCTTATGCTGCCTTAACATCTACTT
710961 037 Jurkat-MainLib -----GACATTACTGTACTTTCGGGAATTCCTTATTCGGTACTGCGCCC
709710 037 Jurkat-MainLib -----GACATTACTGTACTTTCGGGAATTCCTTATTCGGTACTGCGCCC
711121 007 Jurkat-ComLib -----AGTGAATTACGATTGCGTAAGGGCGGAGGGGAAATACGTAGCTAT
710001 007 Jurkat-ComLib -----AGTGAATTACGATTGCGTAAGGGCGGAGGGGAAATACGTAGCTAT
710987 043 Jurkat-MainLib -----GTGGTCACTCGTTGAAATGCTAAACTCGGTTAAGTGACGTTTATAC
709736 043 Jurkat-MainLib -----GTGGTCACTCGTTGAAATGCTAAACTCGGTTAAGTGACGTTTATAC
711045 038 Jurkat-ComLib -----TTGATGCTTATCTAGTTGCTTAAATTAATTTGTTTAAATGCGACTC

```

1 . . . . . 10 . . . . . 20 . . . . . 30 . . . . . 40 . . . . . 50 . . . . . 60 . . . . . 70 . . . . . 80 . . . . . 90 . . . . .



709794\_038\_Jurkat-ComLib -----TTGATGCTTATCTAGTTGC TTAATTACATTGTTTAATGCGACTC-----  
711222\_023\_Jurkat-MainLib -----AGGTGTATATGCATCTTACCACCTTAGCGCTCTCATTATTCGATAC-----  
710100\_023\_Jurkat-MainLib -----AGGTGTATATGCATCTTACCACCTTAGCGCTCTCATTATTCGATAC-----  
710974\_036\_Jurkat-MainLib -----AATTTTATCTTTGTTACTTCTGTTTCTGTAATT-TTCCATATGCC-----  
709723\_036\_Jurkat-MainLib -----AATTTTATCTTTGTTACTTCTGTTTCTGTAATT-TTCCATATGCC-----  
711020\_032\_Jurkat-ComLib -----GATAAGTTAACTACTCACTTTCCCTTATTCTCCTTATCGAC-ACC-----  
709769\_032\_Jurkat-ComLib -----GATAAGTTAACTACTCACTTTCCCTTATTCTCCTTATCGAC-ACC-----  
711094\_034\_Jurkat-ComLib -----AAAAATTAACGGATCCCTCCCCGAGTACTACCTATTGCGCCACC-----  
711276\_047\_Jurkat-ComLib -----CTAACTATTGACCTGCTCCTTTTTCCATTTTTCCGTATAGCGCC-----  
709667\_008\_Jurkat-MainLib -----GGCCTTCCCGGTACTGCATAAATTAGTCTAAATTTGCTTCCGGC-----  
710918\_008\_Jurkat-MainLib -----GGCCTTCCCGGTACTGCATAAATTAGTCTAAATTTGCTTCCGGC-----  
708264\_036\_Jurkat-MainLib -----AGCGTCGCAGAGATTGAGCTAATCTTGTCTACCGTTACTCCACTA-----  
711310\_036\_Jurkat-MainLib -----AGCGTCGCAGAGATTGAGCTAATCTTGTCTACCGTTACTCCACTA-----  
711225\_039\_Jurkat-MainLib -----GTTTTCCATCCTAGCG-ACITTTGCTGTTTTAGTTTTCTCGCATTAG-----  
710103\_039\_Jurkat-MainLib -----GTTTTCCATCCTAGCG-ACITTTGCTGTTTTAGTTTTCTCGCATTAG-----  
710947\_030\_Jurkat-MainLib -----CAGCTTTTTCTGTCATTGCGGACCTTGTCAAGTTCGGGGCAAATCAT-----  
709696\_030\_Jurkat-MainLib -----CAGCTTTTTCTGTCATTGCGGACCTTGTCAAGTTCGGGGCAAATCAT-----  
710973\_036\_Jurkat-MainLib -----GGGATACTATTCTCGATCATTACTAAGCTTCTCGGGCAAAGC-----  
709722\_036\_Jurkat-MainLib -----GGGATACTATTCTCGATCATTACTAAGCTTCTCGGGCAAAGC-----  
711192\_042\_Jurkat-MainLib -----GTCTATCATGTTTCCATTTTCTAGCCTGCAGAAATTTCTCCGCC-----  
710072\_042\_Jurkat-MainLib -----GTCTATCATGTTTCCATTTTCTAGCCTGCAGAAATTTCTCCGCC-----  
711230\_006\_Jurkat-MainLib -----AACTACTCCATAGTTTAG-CAGGGCGATC-TTTTGAGTTTTTTCAAG-----  
710108\_006\_Jurkat-MainLib -----AACTACTCCATAGTTTAG-CAGGGCGATC-TTTTGAGTTTTTTCAAG-----  
711081\_035\_Jurkat-ComLib -----CTGTTACGCAATTCC--CAGGTTGATTACTTCTAGTGTATCAACTG-----  
709830\_035\_Jurkat-ComLib -----CTGTTACGCAATTCC--CAGGTTGATTACTTCTAGTGTATCAACTG-----  
711058\_037\_Jurkat-ComLib -----CATGTGAGGTACTTGCA-AGGTATACTACTGGTGGTTG-CGTTGTTT-----  
709807\_037\_Jurkat-ComLib -----CATGTGAGGTACTTGCA-AGGTATACTACTGGTGGTTG-CGTTGTTT-----  
711111\_016\_Jurkat-ComLib -----CA-GCAATGTCCCTGCA-AG-TTTAGTTCGGGTGTTCTGCTACTAAGTC-----  
709991\_016\_Jurkat-ComLib -----CA-GCAATGTCCCTGCA-AG-TTTAGTTCGGGTGTTCTGCTACTAAGTC-----  
708210\_016\_Jurkat-MainLib -----CCC GTTAGTTACTAGCG--TATA TTAGCCACCTTAATGATCA CAACC-----  
711256\_016\_Jurkat-MainLib -----CCC GTTAGTTACTAGCG--TATA TTAGCCACCTTAATGATCA CAACC-----  
711023\_048\_Jurkat-ComLib -----TTTAGCGATTAAATTGCC--CGC-TTGATTTTCCAACCAAGCCTGATC-----  
709772\_048\_Jurkat-ComLib -----TTTAGCGATTAAATTGCC--CGC-TTGATTTTCCAACCAAGCCTGATC-----  
709668\_016\_Jurkat-MainLib -----GATTCAATAGATACTTTTGG--GGCTTAATTTGCTACGTTATGTCAC-----  
710919\_016\_Jurkat-MainLib -----GATTCAATAGATACTTTTGG--GGCTTAATTTGCTACGTTATGTCAC-----  
711118\_040\_Jurkat-MainLib -----GGTAGTCGAGTCTGGATGGAATAAGGTACTTTCGTCTGT-TTACTCT-----  
709998\_040\_Jurkat-MainLib -----GGTAGTCGAGTCTGGATGGAATAAGGTACTTTCGTCTGT-TTACTCT-----  
711207\_016\_Jurkat-MainLib -----AATGTAGCGCTGGCCTAAATTGGACGTTTCC TGAGTTCCGACGTC-----  
710085\_016\_Jurkat-MainLib -----AATGTAGCGCTGGCCTAAATTGGACGTTTCC TGAGTTCCGACGTC-----  
710925\_040\_Jurkat-MainLib -----CGACTGCGGTTGCGGTGGCTTTACATGGTGAAGCCTGGCAGGTAG-----  
709674\_040\_Jurkat-MainLib -----CGACTGCGGTTGCGGTGGCTTTACATGGTGAAGCCTGGCAGGTAG-----  
711269\_023\_Jurkat-ComLib -----GCTGGC-----  
711199\_025\_Jurkat-MainLib -----GCTGGCATCTTGTTATACGTTTTCGCACGGAGCTGGTGTCTGTC-----  
710079\_025\_Jurkat-MainLib -----GCTGGCATCTTGTTATACGTTTTCGCACGGAGCTGGTGTCTGTC-----  
708223\_023\_Jurkat-ComLib -----GCTGGC-----  
711144\_046\_Jurkat-MainLib -----CGGCCTTAGATTGCAATTCG-GTGATGCATCTGTTGTAAGGCTGGG-----  
710024\_046\_Jurkat-MainLib -----CGGCCTTAGATTGCAATTCG-GTGATGCATCTGTTGTAAGGCTGGG-----  
711106\_033\_Jurkat-ComLib -----GACTTCCACCCGGTCTGCCTACGATGTTGAGCCTCACAACTTA-----

1.....10.....20.....30.....40.....50.....60.....70.....80.....90.....

```

709855_033_Jurkat-ComLib -----GACTTCCAACCCGCGTGTGCTTACGATGTTGAGCCTCACAACTTA-----
709719_020_Jurkat-MainLib -----GGTCGCTGTTGGGGGGACATTTAGGTTTCT--ATTTGTCACTGTCCG-----
710970_020_Jurkat-MainLib -----GGTCGCTGTTGGGGGGACATTTAGGTTTCT--ATTTGTCACTGTCCG-----
710060_043_Jurkat-MainLib -----GCCTTGTCCCATGACTTTTTGAATTACACGACTTATCACACTGGG-----
711324_043_Jurkat-ComLib -----GCCTTGTCCCATGACTTTTTGAATTACACGACTTATCACACTGGG-----
711180_043_Jurkat-MainLib -----GCCTTGTCCCATGACTTTTTGAATTACACGACTTATCACACTGGG-----
709741_010_Jurkat-MainLib -----CGAGGCATATGTTGCTTCTTCGACAAATTTAGGAGTTTAGCCCTGC-----
710992_010_Jurkat-MainLib -----CGAGGCATATGTTGCTTCTTCGACAAATTTAGGAGTTTAGCCCTGC-----
711132_047_Jurkat-MainLib -----GCCGACGTATTGTGCGACGCTTTTTGAGATTACCTGCTGGATGTT-----
710012_047_Jurkat-MainLib -----GCCGACGTATTGTGCGACGCTTTTTGAGATTACCTGCTGGATGTT-----
710972_028_Jurkat-MainLib -----AAATTTGCATTTTGGTTTAAACAGGGGGACTGGTGGTATAGGGAAG-----
709721_028_Jurkat-MainLib -----AAATTTGCATTTTGGTTTAAACAGGGGGACTGGTGGTATAGGGAAG-----
708221_015_Jurkat-MainLib -----AAGTTGAATTAAGGCCGAAGAATGGTTTAGGGCTTTCGGTGTTC-----
711267_015_Jurkat-MainLib -----AAGTTGAATTAAGGCCGAAGAATGGTTTAGGGCTTTCGGTGTTC-----
708211_024_Jurkat-ComLib -----CTCTTATTGACGGGGGCAGGCTCTATGGTGATTTGTAGTTGAAC-----
711257_024_Jurkat-ComLib -----CTCTTATTGACGGGGGCAGGCTCTATGGTGATTTGTAGTTGAAC-----
708253_045_Jurkat-MainLib -----CGGTATAGCTCGTTAGTC---ACAAGGGTAAGCATCACCACAATCTTCC-----
711299_045_Jurkat-MainLib -----CGGTATAGCTCGTTAGTC---ACAAGGGTAAGCATCACCACAATCTTCC-----
711133_006_Jurkat-ComLib -----ATCAGTGAATCGTATTCCCTCGGTA CTAGGATAAAATATCTATCTAT-----
710013_006_Jurkat-ComLib -----ATCAGTGAATCGTATTCCCTCGGTA CTAGGATAAAATATCTATCTAT-----
708247_021_Jurkat-ComLib -----ATCAGTGAATCGTATTCCCTCGGTA CTAGGATAAAATATCTATCTAT-----
711293_021_Jurkat-ComLib -----ATCAGTGAATCGTATTCCCTCGGTA CTAGGATAAAATATCTATCTAT-----
711193_001_Jurkat-ComLib -----CAGCTCCACCAGAACTTTCATTTCTTGG--CCAGG-GTTCGTATGTA-----
710073_001_Jurkat-ComLib -----TCCTGCTGCCACCGACTTTAATACCGTGA--AGTGGTGTTCCTAGTTA-----
711220_015_Jurkat-MainLib -----CTACATTGAGTTTCTAGCGCCGACCGATTGTAGCGAGGGAGCTAT-----
710098_015_Jurkat-MainLib -----CTACATTGAGTTTCTAGCGCCGACCGATTGTAGCGAGGGAGCTAT-----
711196_009_Jurkat-ComLib -----TAGCACAACTAACCACGC--ATTGGTTTGTCTCTTGGACCCTTT-----
710076_009_Jurkat-ComLib -----TAGCACAACTAACCACGC--ATTGGTTTGTCTCTTGGACCCTTT-----
711241_005_Jurkat-MainLib -----CTGAGAGAATCCTCAGTGTAGTAGTTCGGGCGGCAC TGGGACG-----
710119_005_Jurkat-MainLib -----CTGAGAGAATCCTCAGTGTAGTAGTTCGGGCGGCAC TGGGACG-----
711112_016_Jurkat-ComLib -----AGCAGGTC---GGGTAGTTTCTTCCAGCGCG--ACTGTGGCGCTCAGAAT-----
709992_016_Jurkat-ComLib -----AGCAGGTC---GGGTAGTTTCTTCCAGCGCG--ACTGTGGCGCTCAGAAT-----
711000_042_Jurkat-MainLib -----AATTGACTGTATGAGCTC---GAATCGATTCCGACAGTGCCTCCCA-----
709749_042_Jurkat-MainLib -----AATTGACTGTATGAGCTC---GAATCGATTCCGACAGTGCCTCCCA-----
711131_047_Jurkat-MainLib -----GCAGGAGGTT---TCCTCAAGTCCCA--AGTGTGTACCGCAATATGTAGG-----
710011_047_Jurkat-MainLib -----GCAGGAGGTT---TCCTCAAGTCCCA--AGTGTGTACCGCAATATGTAGG-----
711011_041_Jurkat-MainLib -----ATGTATGGTATCTAGTTGGT--AGCGCTTTCGGGGAGCCTTGTGATG-----
709760_041_Jurkat-MainLib -----ATGTATGGTATCTAGTTGGT--AGCGCTTTCGGGGAGCCTTGTGATG-----
708277_043_Jurkat-MainLib -----CATGTCGGATACCGAGCTTGG--ACCGTGGCCGGCCCCCAATTCA-----
711323_043_Jurkat-MainLib -----CATGTCGGATACCGAGCTTGG--ACCGTGGCCGGCCCCCAATTCA-----
709702_005_Jurkat-MainLib -----TGACCTTG---ACCGTAGTTAGCTCCTTCGGTTAGACTTTAGAAATCT-----
708294_009_Jurkat-MainLib -----TAGGGCTATTGTGCTAGCCTAAAGGGGTTGGGCCTCGATTTCGG-----
711340_009_Jurkat-MainLib -----TAGGGCTATTGTGCTAGCCTAAAGGGGTTGGGCCTCGATTTCGG-----
711174_019_Jurkat-ComLib -----GGTAGGCCATT--CGCTAG-----
710054_019_Jurkat-ComLib -----GGTAGGCCATT--CGCTAG-----
711153_037_Jurkat-MainLib -----GTGCGGTTGCCAATGGAGCTCCGTCGTAGAGCTAGTTGTTCTGC-----
710033_037_Jurkat-MainLib -----GTGCGGTTGCCAATGGAGCTCCGTCGTAGAGCTAGTTGTTCTGC-----
711034_039_Jurkat-ComLib -----ATAACCTTAGGGACTCAACTAGAGC--CCGAGTGTATTGTAGTTGG-----

```

1.....10.....20.....30.....40.....50.....60.....70.....80.....90.....



```

709783 039 Jurkat-ComLib      -ATAACCCCTAGGGACTCAACTAGAGC-CCGAGTGTATTGTAAGTTGG-
711243 013 Jurkat-MainLib      -AATCGTTCC--CACCTGCCTGGTTGCGCCCTCGGGTCGCGTCAACGA
710121 013 Jurkat-MainLib      -AATCGTTCC--CACCTGCCTGGTTGCGCCCTCGGGTCGCGTCAACGA
711185 018 Jurkat-ComLib      -GCCTCGGTCTATTCCCAACTTTGTTGCGGTGTCGGGGC-CGTCTAG
710065 018 Jurkat-ComLib      -GCCTCGGTCTATTCCCAACTTTGTTGCGGTGTCGGGGC-CGTCTAG
708281 010 Jurkat-MainLib      -GCCCATCGCTGTTGGGGAGCGGGGGTATCAGTCGGTGACTTGGG-
711327 010 Jurkat-MainLib      -GCCCATCGCTGTTGGGGAGCGGGGGTATCAGTCGGTGACTTGGG-
710935 031 Jurkat-MainLib      -TCAGCGCCCCGGCCTGTGCTGGGAT-CCCAGGTGGAACCTGGTCAG-
709684 031 Jurkat-MainLib      -TCAGCGCCCCGGCCTGTGCTGGGAT-CCCAGGTGGAACCTGGTCAG-
711071 044 Jurkat-ComLib      -AGTACCCCTTCCCTTTGCGCTTAT-CTGAAGTGAGCCCTAGCATGGA-
709820 044 Jurkat-ComLib      -AGTACCCCTTCCCTTTGCGCTTAT-CTGAAGTGAGCCCTAGCATGGA-
711190 034 Jurkat-MainLib      -TTTGGGGGCCGTAA-ACCAC TTGCAAC--TAGACCGTCGCCGGGTGCT-
710070 034 Jurkat-MainLib      -TTTGGGGGCCGTAA-ACCAC TTGCAAC--TAGACCGTCGCCGGGTGCT-
711335 042 Jurkat-MainLib      -ACCTGGACTGCCCTGATACCCAA TGAAACA-TCGGCTTTCGCCATT-
710960 029 Jurkat-MainLib      -GACTCCCATGATTTCTGGTCCGGGCTCCACGGGCCCGGGA CCT-
711317 019 Jurkat-ComLib      -G-
710971 028 Jurkat-MainLib      -AGTCCGGGT--AGGGTTGTTACGGGACCTGCCAC-GGGCACAGCGTCG-
709720 028 Jurkat-MainLib      -AGTCCGGGT--AGGGTTGTTACGGGACCTGCCAC-GGGCACAGCGTCG-
709743 018 Jurkat-MainLib      -GTTGGTGTTTAGGGTTGT---GGTCTGCTGCTGGGCAGTCCGTAGGC-
710994 018 Jurkat-MainLib      -GTTGGTGTTTAGGGTTGT---GGTCTGCTGCTGGGCAGTCCGTAGGC-
711120 048 Jurkat-MainLib      -GACTTTGGGTGCTGTT-AAGTTTAG---GGATCCTGTCGCCCGTGTA-
710000 048 Jurkat-MainLib      -GACTTTGGGTGCTGTT-AAGTTTAG---GGATCCTGTCGCCCGTGTA-
710996 026 Jurkat-MainLib      -TATCGTGCTAGGCTGGATAGAGGGGTCTGCCTGAGACCTAAGAT-
709745 026 Jurkat-MainLib      -TATCGTGCTAGGCTGGATAGAGGGGTCTGCCTGAGACCTAAGAT-
709671 024 Jurkat-MainLib      -GTTCCCGAAGCCGGTGTGTTAGGTTAG-TAG-GTCCGCCCTGCTTGC-
710922 024 Jurkat-MainLib      -GTTCCCGAAGCCGGTGTGTTAGGTTAG-TAG-GTCCGCCCTGCTTGC-
709740 010 Jurkat-MainLib      -AGGTTCTTGGTGGTTAGTCAGGGGAATRRGGGTGTGTCGTCTGTGT-
710991 010 Jurkat-MainLib      -AGGTTCTTGGTGGTTAGTCAGGGGA-
709752 009 Jurkat-MainLib      -TAGGATGKGGGTGTTTAGTGAGGTACCTTTACCGGATGGCTGCG-
711003 009 Jurkat-MainLib      -TAGGATGKGGGTGTTTAGTGAGGTACCTTTACCGGATGGCTGCG-
709717 012 Jurkat-MainLib      -TGTTTAGTGTGAATTAGACTTTGGTTAGTTTATGTTCCCTTGGTCC-
710968 012 Jurkat-MainLib      -TGTTTAGTGTGAATTAGACTTTGGTTAGTTTATGTTCCCTTGGTCC-
710114 030 Jurkat-MainLib      -ACCACAGCCAGAGTGTGAGATTTGGGTTGAT-ATGTTCGATGAGG-
711134 006 Jurkat-ComLib      -CTCAGATGTACACTGTCTTATTTCTCAGATTTTACCTGAACTCCA-
710014 006 Jurkat-ComLib      -CTCAGATGTACACTGTCTTATTTCTCAGATTTTACCTGAACTCCA-
711157 004 Jurkat-ComLib      -ATTGGTATAAACTAATTTAGGATTCGGGTGTTTCTGTGGTTCAA-
710037 004 Jurkat-ComLib      -ATTGGTATAAACTAATTTAGGATTCGGGTGTTTCTGTGGTTCAA-
711305 020 Jurkat-ComLib      -GAACAGCGTCTTGTGTTGTGATATTTAAGGTCAGTTGTAACCAC-
709690 006 Jurkat-MainLib      -ATACGTCGTAT-TAGGTACCGGTTTTCTGCGTTCGGTTATGGATTC-
710941 006 Jurkat-MainLib      -ATACGTCGTAT-TAGGTACCGGTTTTCTGCGTTCGGTTATGGATTC-
711138 022 Jurkat-ComLib      -TTGACTGTACCTTGTATTGCTTACCTGT-TACGGTTTGCAGCTT-
710018 022 Jurkat-ComLib      -TTGACTGTACCTTGTATTGCTTACCTGT-TACGGTTTGCAGCTT-
708209 016 Jurkat-MainLib      -CAGGTCGAGCGCAGAC-CTGGGTGCTGGTCCGCTGTTTTATATC-
711255 016 Jurkat-MainLib      -CAGGTCGAGCGCAGAC-CTGGGTGCTGGTCCGCTGTTTTATATC-
709692 014 Jurkat-MainLib      -TGGAAGGAAGCGTTCCTGATTAGCTTGTCTTGTGTGTTATTG-
710943 014 Jurkat-MainLib      -TGGAAGGAAGCGTTCCTGATTAGCTTGTCTTGTGTGTTATTG-
709755 017 Jurkat-MainLib      -WTTGGKTGGTTCGCSGTCTTAT-GGCTTCTTCGG-GTAGTATTAC-
711006 017 Jurkat-MainLib      -ATTGGTTGGTTCGCGGTCGTTAT-GGCTTCTTCGG-GTAGTATTAC-

```

1.....10.....20.....30.....40.....50.....60.....70.....80.....90.....

```

711141 038 Jurkat-MainLib      TCAGTCGAGGTATGGTTC TTAGTAGCTCAGCGGTGCGTGTGATTC
710021 038 Jurkat-MainLib      TCAGTCGAGGTATGGTTC TTAGTAGCTCAGCGGTGCGTGTGATTC
711155 045 Jurkat-MainLib      ---TATTGGGATCGTAA TGACTTGGTGGCGTGGTGTGACTCGGTGC
710035 045 Jurkat-MainLib      ---TATTGGGATCGTAA TGACTTGGTGGCGTGGTGTGACTCGGTGC
711191 042 Jurkat-MainLib      CAGGTTGCCGAGTAGC  GTTATCCGTTTCATAATATATGTATATCC
710071 042 Jurkat-MainLib      CAGGTTGCCGAGTAGC  GTTATCCGTTTCATAATATATGTATATCC
711135 014 Jurkat-ComLib      TTATGCCATTGTAAAG  GTTGCTCGCGCAACTGATGGTTTGGGA
711209 024 Jurkat-MainLib      TTGATCCGGGAGAGGA  TGAAGGAATCCTGATCCAATCTCGATTG
710087 024 Jurkat-MainLib      TTGATCCGGGAGAGGA  TGAAGGAATCCTGATCCAATCTCGATTG
710928 048 Jurkat-MainLib      ---GTACATGGA TCTAGCACTCG  GATCCGAGCTCTGCGGGGTACGGCG
709677 048 Jurkat-MainLib      ---GTACATGGA TCTAGCACTCG  GATCCGAGCTCTGCGGGGTACGGCG
708217 048 Jurkat-MainLib      GGGATTTCAATAAT  CCCTGCAC TTT  TGAATGCATCAT TCTCTTTGG
711263 048 Jurkat-MainLib      GGGATTTCAATAAT  CCCTGCAC TTT  TGAATGCATCAT TCTCTTTGG
711096 042 Jurkat-ComLib      ATCTCAATATTGGA  CCAAGCAATT  ACCTATTGGACGAT TCTCAT
709845 042 Jurkat-ComLib      ATCTCAATATTGGA  CCAAGCAATT  ACCTATTGGACGAT TCTCAT
711150 021 Jurkat-ComLib      GAGGACTACCAGGC  GATAATGTGC  TATCC  CTGGAAGCTTGAGTT
710030 021 Jurkat-ComLib      GAGGACTACCAGGC  GATAATGTGC  TATCC  CTGGAAGCTTGAGTT
710975 044 Jurkat-MainLib      CTTTGGAGGAGCG  GAACGTGCC  TCCTGACTAAAT  TGCCTAGG
709724 044 Jurkat-MainLib      CTTTGGAGGAGCG  GAACGTGCC  TCCTGACTAAAT  TGCCTAGG
711095 042 Jurkat-ComLib      GGAGGACCCTGCG  AAGTGATCCC  GAACAAAAGGC  ATCTCGTTATC
709844 042 Jurkat-ComLib      GGAGGACCCTGCG  AAGTGATCCC  GAACAAAAGGC  ATCTCGTTATC
708222 015 Jurkat-MainLib      ATAAACCAATTC  ACCTTTTCA  TAGTCTTCGAA  CAAACT-ACCCGAGA
711268 015 Jurkat-MainLib      ATAAACCAATTC  ACCTTTTCA  TAGTCTTCGAA  CAAACT-ACCCGAGA
711060 045 Jurkat-ComLib      CACTAATTCGCC  ACTCCAGGC  TCCAGTACTAG  CTCTGTTCAAAGT
709809 045 Jurkat-ComLib      CACTAATTCGCC  ACTCCAGGC  TCCAGTACTAG  CTCTGTTCAAAGT
711170 003 Jurkat-ComLib      TGTGTAAC TGTGGGGAG  CTAAGTCCCT  ACT-CTCCACACTCG  TTG
710050 003 Jurkat-ComLib      TGTGTAAC TGTGGGGAG  CTAAGTCCCT  ACT-CTCCACACTCG  TTG
710088 024 Jurkat-MainLib      G
711213 040 Jurkat-MainLib      TATTAGATAAA  TCGAACCCG  CAGACTACATT  TGGCAGTGGGGTG
710091 040 Jurkat-MainLib      TATTAGATAAA  TCGAACCCG  CAGACTACATT  TGGCAGTGGGGTG
711195 009 Jurkat-ComLib      AGTCCTCGAA  TCTCCGTCT  TTGCATTGGT  GGCATAAACGCA  AAGCG
710075 009 Jurkat-ComLib      AGTCCTCGAA  TCTCCGTCT  TTGCATTGGT  GGCATAAACGCA  AAGCG
710963 045 Jurkat-MainLib      ACTGCTCTTT  GATCCTTG  CTGTGTTGG  TGGCATGAA  TCAAGTT
709712 045 Jurkat-MainLib      ACTGCTCTTT  GATCCTTG  CTGTGTTGG  TGGCATGAA  TCAAGTT
711167 044 Jurkat-MainLib      GAGCGTCC  CTGCTGAT  TTTTCCCT  TTTTATAC  ATACGTCG  TGCCA
710047 044 Jurkat-MainLib      GAGCGTCC  CTGCTGAT  TTTTCCCT  TTTTATAC  ATACGTCG  TGCCA
711201 033 Jurkat-MainLib      TTTAAAA  TTCCCTT  CTTTTT  TTTTGG  CGGTTA  TAAGCAG  GGTCCG
710081 033 Jurkat-MainLib      TTTAAAA  TTCCCTT  CTTTTT  TTTTGG  CGGTTA  TAAGCAG  GGTCCG
711240 046 Jurkat-MainLib      GCCGATAG  AGTGTCC  GTCGTGG  GCAAGT  AGAAACA  TAAGTCC  TGT
710118 046 Jurkat-MainLib      GCCGATAG  AGTGTCC  GTCGTGG  GCAAGT  AGAAACA  TAAGTCC  TGT
711147 013 Jurkat-ComLib      TCGGTCT  GTCCTAT  CTA  TGGGAG  GTAAGAA  CTTT  GTTCC  TGATT
710027 013 Jurkat-ComLib      TCGGTCT  GTCCTAT  CTA  TGGGAG  GTAAGAA  CTTT  GTTCC  TGATT
711251 045 Jurkat-MainLib      GTTAGGG  TGTGTC  GTCGTGG  TAAGG  AGCAGC  GTGGAG  GATA
710129 045 Jurkat-MainLib      GTTAGGG  TGTGTC  GTCGTGG  TAAGG  AGCAGC  GTGGAG  GATA
709757 025 Jurkat-MainLib      TTAGGG  TGTGTC  GTCGTGG  TAAGG  AGCAGC  GTGGAG  GATA
711008 025 Jurkat-MainLib      TTAGGG  TGTGTC  GTCGTGG  TAAGG  AGCAGC  GTGGAG  GATA
710952 046 Jurkat-MainLib      GTACACTAG  TTTATGT  CCCGGT  CGACAT  CACTGT  AGCGGC  GTCAGTTAG  GGTGTG  TCGTGT  GGTACTC  GTGGT  GCCGC
709701 046 Jurkat-MainLib      GTACACTAG  TTTATGT  CCCGGT  CGACAT  CACTGT  AGCGGC  GTCAGTTAG  GGTGTG  TCGTGT  GGTACTC  GTGGT  GCCGC

```



```

708271_019_Jurkat-ComLib -----GTTAGGGTTTGTCTGCTGCTGGT-----
710986_035_Jurkat-MainLib -----TTAGGGTGTGTCTGCTGCTGGTAAAGGGGGTTAATGAGGTTG-----
710995_026_Jurkat-MainLib -----TTAGGGTGTGTCTGCTGCTGGTAAAGGGGGTTAATGAGGTTG-----
709735_035_Jurkat-MainLib -----TTAGGGTGTGTCTGCTGCTGGTAAAGGGGGTTAATGAGGTTG-----
709744_026_Jurkat-MainLib -----TTAGGGTGTGTCTGCTGCTGGTAAAGGGGGTTAATGAGGTTG-----
711047_046_Jurkat-ComLib -----AAAGTTAGCTGTTTCCCTCGTGGCAGAAGGAACAGACCACCGTACT-----
709796_046_Jurkat-ComLib -----AAAGTTAGCTGTTTCCCTCGTGGCAGAAGGAACAGACCACCGTACT-----
710983_027_Jurkat-MainLib -----TCCCTCTTTTCTTGTGCGACA-GACATAAGTATCAACTTGGCCGCA-----
709732_027_Jurkat-MainLib -----TCCCTCTTTTCTTGTGCGACA-GACATAAGTATCAACTTGGCCGCA-----
711162_020_Jurkat-ComLib -----ACCAGAAATCAAATTCAAACCTGGTAGGGAACACGCTCTCGGCTGG-----
710042_020_Jurkat-ComLib -----ACCAGAAATCAAATTCAAACCTGGTAGGGAACACGCTCTCGGCTGG-----
711239_046_Jurkat-MainLib -----CTAGTAAGTTGCGATTTTGTCCGGGACGTGTCTATTGTAGGGC-----
710117_046_Jurkat-MainLib -----CTAGTAAGTTGCGATTTTGTCCGGGACGTGTCTATTGTAGGGC-----
711022_040_Jurkat-ComLib -----TTATCAGTGGTAAATTG-GATTTACCCGCGGACG-GCTCAGCGTAGG-----
709771_040_Jurkat-ComLib -----TTATCAGTGGTAAATTG-GATTTACCCGCGGACG-GCTCAGCGTAGG-----
709670_024_Jurkat-MainLib -----ATTATCAATGGGGCTTTCGATCGGCGGTTCTATACAGCGTAGTGG-----
710921_024_Jurkat-MainLib -----ATTATCAATGGGGCTTTCGATCGGCGGTTCTATACAGCGTAGTGG-----
708300_033_Jurkat-MainLib -----TCTCGATCAGGAGGGGGTATTGCGCGTGTAAAGTCGAATTGAGC-----
711346_033_Jurkat-MainLib -----TCTCGATCAGGAGGGGGTATTGCGCGTGTAAAGTCGAATTGAGC-----
711247_029_Jurkat-MainLib -----GAGAATCAGTTTAGTAGA-GAATTTACCGCGAGTTGGGCCCGGCA-----
710125_029_Jurkat-MainLib -----GAGAATCAGTTTAGTAGA-GAATTTACCGCGAGTTGGGCCCGGCA-----
711021_040_Jurkat-ComLib -----GGAGGTAGCATGTGATTAATAGCTGCTTTTTCACGGCGATTTCCGC-----
709770_040_Jurkat-ComLib -----GGAGGTAGCATGTGATTAATAGCTGCTTTTTCACGGCGATTTCCGC-----
711010_033_Jurkat-MainLib -----ACAAGTGCTCTCTAGTAAACACCCCTCAAAGCAATGAATGGCAGC-----
709759_033_Jurkat-MainLib -----ACAAGTGCTCTCTAGTAAACACCCCTCAAAGCAATGAATGGCAGC-----
711082_035_Jurkat-ComLib -----AACTCCAGAGCGAGTGACTGCTAG-----
709831_035_Jurkat-ComLib -----AACTCCAGAGCGAGTGACTGCTAG-----
711214_040_Jurkat-MainLib -----TGGTGTCTGTAAACGGTATCTAAACGATACA-TCTCGGA-GTGCCCC-----
710092_040_Jurkat-MainLib -----TGGTGTCTGTAAACGGTATCTAAACGATACA-TCTCGGA-GTGCCCC-----
711019_032_Jurkat-ComLib -----ATTTAAACATGAGGATACGAACCCGTACC-GCTGAGACGTGACCA-----
709768_032_Jurkat-ComLib -----CGAACCCGTACC-GCTGAGACGTGACCA-----
709704_013_Jurkat-MainLib -----GGGACCCGTGGATATAAGGATATGCTAGCTGTGACCCTTAACTG-----
710955_013_Jurkat-MainLib -----GGGACCCGTGGATATAAGGATATGCTAGCTGTGACCCTTAACTG-----
711104_025_Jurkat-ComLib -----ACCCCGAAAATTAGGACGTAAGAA-GTGCGAAC TGAGGCGCGTTAG-----
709853_025_Jurkat-ComLib -----ACCCCGAAAATTAGGACGTAAGAA-GTGCGAAC TGAGGCGCGTTAG-----
711163_028_Jurkat-MainLib -----CACGCCGGTAAAGCTGTAGACTTTTCT-TCPTTGAGACTAATCGTT-----
710043_028_Jurkat-MainLib -----CACGCCGGTAAAGCTGTAGACTTTTCT-TCPTTGAGACTAATCGTT-----
708233_014_Jurkat-MainLib -----ACAGTCAGGTCCTATAATCCGGTATCTGTGACACTTTTCTCACC-----
711279_014_Jurkat-MainLib -----ACAGTCAGGTCCTATAATCCGGTATCTGTGACACTTTTCTCACC-----
711221_023_Jurkat-MainLib -----TGAGATGGCATTATGCCTGAATATGTT---ATGGACATATTTTATGG-----
710099_023_Jurkat-MainLib -----TGAGATGGCATTATGCCTGAATATGTT---ATGGACATATTTTATGG-----
711117_040_Jurkat-MainLib -----TCGCGAGGCCTTATCTTG--TGAGATAG---GATCGACATGATTCGCGT-----
709997_040_Jurkat-MainLib -----TCGCGAGGCCTTATCTTG--TGAGATAG---GATCGACATGATTCGCGT-----
711046_038_Jurkat-ComLib -----AACTTATCTTGCTTGAACCTCGTTT---AATCGAGATATTTTCG-GTGGC-----
709795_038_Jurkat-ComLib -----AACTTATCTTGCTTGAACCTCGTTT---AATCGAGATATTTTCG-GTGGC-----
709714_004_Jurkat-MainLib -----GGGTGATTGATTGTGCGACCTTAGTTTGGACTCGGTTATCTCACT-----
710965_004_Jurkat-MainLib -----GGGTGATTGATTGTGCGACCTTAGTTTGGACTCGGTTATCTCACT-----
711070_036_Jurkat-ComLib -----ACTGAGGAACCTAAATGATGACTCTTGTTCCTCATCTGCCCTAT-----

```

1.....10.....20.....30.....40.....50.....60.....70.....80.....90.....

```

709819_036_Jurkat-ComLib -----ACTGAGGAACCTAAATGATGACTCTTGTTCCTCATCTGCCCTAT
711197_017_Jurkat-ComLib -----TGAGTATTTTTGCC TGGGCAAAC TCAATTTAACT-ATTCAGGTCCG
710077_017_Jurkat-ComLib -----TGAGTATTTTTGCC TGGGCAAAC TCAATTTAACT-ATTCAGGTCCG
709694_022_Jurkat-MainLib -----CAATGTGATCCGGTTTAGTCTACGTTTCGTC--TAGCGATGGCGATT
710945_022_Jurkat-MainLib -----CAATGTGATCCGGTTTAGTCTACGTTTCGTC--TAGCGATGGCGATT
711115_032_Jurkat-MainLib -----CAAAA--ACCCGGTATCTGAGAGTCTAGTG--TGCTACATTGTGCTA
709995_032_Jurkat-MainLib -----CAAAA--ACCCGGTATCTGAGAGTCTAGTG--TGCTACATTGTGCTA
711188_026_Jurkat-MainLib -----AGCCTATGTGCGACTTGTCACTCAGTGGAGAGGGTTGTTCCGGAG
710068_026_Jurkat-MainLib -----AGCCTATGTGCGACTTGTCACTCAGTGGAGAGGGTTGTTCCGGAG
711093_034_Jurkat-ComLib -----ACAGAAGATCCTATGTACTAC--GTTTCTGCAGTGGCTAAGCTTAAT
709842_034_Jurkat-ComLib -----ACAGAAGATCCTATGTACTAC--GTTTCTGCAGTGGCTAAGCTTAAT
711226_039_Jurkat-MainLib -----AGTCGGATGTCTAGAGAGTCCGGGCGCCTGCAGCCATCAGCAA
710104_039_Jurkat-MainLib -----AGTCGGATGTCTAGAGAGTCCGGGCGCCTGCAGCCATCAGCAA
711250_037_Jurkat-MainLib -----AGCGGTTTGGCAGGAGGGAGATTGGCAGTAAGGCAGAGGGGCGG
710128_037_Jurkat-MainLib -----AGCGGTTTGGCAGGAGGGAGATTGGCAGTAAGGCAGAGGGGCGG
710959_029_Jurkat-MainLib -----TAAGTGAT--GGCAGTGGAGAGGTCCCGGCAGCCGCTAGGGGCTG
709708_029_Jurkat-MainLib -----TAAGTGAT--GGCAGTGGAGAGGTCCCGGCAGCCGCTAGGGGCTG
711231_014_Jurkat-MainLib -----TGGGTGGGTAGCACGGGGAGACGGGTCAAGGC GTGTAGACGGAG
710109_014_Jurkat-MainLib -----TGGGTGGGTAGCACGGGGAGACGGGTCAAGGC GTGTAGACGGAG
711130_039_Jurkat-MainLib -----GTAGGGGGGTCAGGG
711177_035_Jurkat-MainLib -----GTAGGGGGGTCAGGG
710010_039_Jurkat-MainLib -----GTAGGGGGGTCAGGG
710057_035_Jurkat-MainLib -----GTAGGGGGGTCAGGG
709703_005_Jurkat-MainLib -----CGACCC TTGGCTGCGGTATGAGGTGAGAGGTA TCTCATAGCCTCC
710954_005_Jurkat-MainLib -----CGACCC TTGGCTGCGGTATGAGGTGAGAGGTA TCTCATAGCCTCC
708216_040_Jurkat-MainLib -----TCACGATTA TTCGCTGTAGGCTGAGGT CATAGGAGGACTGGGC
711262_040_Jurkat-MainLib -----TCACGATTA TTCGCTGTAGGCTGAGGT CATAGGAGGACTGGGC
710927_048_Jurkat-MainLib -----ATCCTGGTCC TCGGTTCCGAATAGAAAGTACTGAGGGGCTCGGA
709676_048_Jurkat-MainLib -----ATCCTGGTCC TCGGTTCCGAATAGAAAGTACTGAGGGGCTCGGA
710984_027_Jurkat-MainLib -----TGGGCGTGCGCTAGTGGAGACTGGGCAGAAACCGCTAGCTGACG
709733_027_Jurkat-MainLib -----TGGGCGTGCGCTAGTGGAGACTGGGCAGAAACCGCTAGCTGACG
711292_013_Jurkat-MainLib -----CGCGCTACGGGTCC TAGATGACACTGGGGCGAGGCCATC-GGTGG
709707_021_Jurkat-MainLib -----GGCGGATGGCGGGGACGGACGGTGGTGCAGCTCACGCTGTGGGG
710958_021_Jurkat-MainLib -----GGCGGATGGCGGGGACGGACGGTGGTGCAGCTCACGCTGTGGGG
710940_047_Jurkat-MainLib -----GCGGC
711079_027_Jurkat-ComLib -----AGTAAACAACGTAGCGGGCGCACCGAATCATTACAGTTTCAGAGG
709828_027_Jurkat-ComLib -----AGTAAACAACGTAGCGGGCGCACCGAATCATTACAGTTTCAGAGG
711237_038_Jurkat-MainLib -----AAAAAGAAAGGTGCTTACGGGGGTGAAGATTAAAGAACGAGCAACC
710115_038_Jurkat-MainLib -----AAAAAGAAAGGTGCTTACGGGGGTGAAGATTAAAGAACGAGCAACC
711067_028_Jurkat-ComLib -----GATATATAAGAGAAGGACATCGCCCGGGGTGACGTTTTTTA--GATC
709816_028_Jurkat-ComLib -----GATATATAAGAGAAGGACATCGCCCGGGGTGACGTTTTTTA--GATC
711032_031_Jurkat-ComLib -----GCTTAAACGCTCAGGGTCTCGGACACGGTACATTAATTTATCGA
709781_031_Jurkat-ComLib -----GCTTAAACGCTCAGGGTCTCGGACACGGTACATTAATTTATCGA
709726_003_Jurkat-MainLib -----CTGGGGAAAGACGGAAGTTTCGTTGAAACGTTAAATTGCTATTGT
709751_001_Jurkat-MainLib -----CTGGGGAAAGACGGAAGTTTCGTTGAAACGTTAAATTGCTATTGT
710977_003_Jurkat-MainLib -----CTGGGGAAAGACGGAAGTTTCGTTGAAACGTTAAATTGCTATTGT
711002_001_Jurkat-MainLib -----CTGGGGAAAGACGGAAGTTTCGTTGAAACGTTAAATTGCTATTGT
711200_025_Jurkat-MainLib -----GGCGGGGATTAAGAGGAAAGGGCGTAGTAGTCGGTGACAGTTAGG

```



```

710080_025_Jurkat-MainLib -----GGCGGGGATTAAGAGGAAAGGGCGTAGTAGTCGGTGACAGTTAGG
708276_035_Jurkat-MainLib -----GGCGGGGATTAAGAGGAAAGGGCGTAGTAGTCGGTGACAGTTAGG
711322_035_Jurkat-MainLib -----GGCGGGGATTAAGAGGAAAGGGCGTAGTAGTCGGTGACAGTTAGG
710985_035_Jurkat-MainLib -----CGCTATGATGTGGCCTAGGGTGTAGGAAACGGACTCCCACGGCCTC
709734_035_Jurkat-MainLib -----CGCTATGATGTGGCCTAGGGTGTAGGAAACGGACTCCCACGGCCTC
709784_047_Jurkat-ComLib -----CCTCAGGGGGTCATTTATCGGGTGGGAGGGACTTC-GCGCGCGCA
710946_022_Jurkat-MainLib -----GTGCA
709681_015_Jurkat-MainLib -----AATGTAATGTGCGATGTTGAGTTGGTGGGGTAGAGA-AGTTCTCCGT
710932_015_Jurkat-MainLib -----AATGTAATGTGCGATGTTGAGTTGGTGGGGTAGAGA-AGTTCTCCGT
710967_012_Jurkat-MainLib -----CCCATTGATGTGCCAATT-AGGTGGTGAGGTACGTATAGTACTC
709727_003_Jurkat-MainLib -----TATCTCGCCGCGGGGTCGRGAAGGTTCCGTTCTTAGCATAATAA
710978_003_Jurkat-MainLib -----TATCTCGCCGCGGGGTCGTGAAGGTTCCGTTCTTAGCATAATAA
709753_009_Jurkat-MainLib -----GTGCGGTACTAGTATGTGGGGTTATTATCGTTGTAATGCTATTAC
711004_009_Jurkat-MainLib -----GTGCGGTACTAGTATGTGGGGTTATTATCGTTGTAATGCTATTAC
711105_033_Jurkat-ComLib -----GACCCGCGGACCAAGTCTTCCGATTCTAAACGTTATCTG-ATTA
709854_033_Jurkat-ComLib -----GACCCGCGGACCAAGTCTTCCGATTCTAAACGTTATCTG-ATTA
711228_047_Jurkat-MainLib -----TGTTCCCTACTCATAATTAGCTCCGCTAATCGTCCGTAAGTTCAA
710106_047_Jurkat-MainLib -----TGTTCCCTACTCATAATTAGCTCCGCTAATCGTCCGTTCAA
708252_037_Jurkat-MainLib -----GTGACAATA-TCAATTCGCTAATGG--GGCAAGTGGTAGCGCTGTGG
711298_037_Jurkat-MainLib -----GTGACAATA-TCAATTCGCTAATGG--GGCAAGTGGTAGCGCTGTGG
711169_003_Jurkat-ComLib -----GTAGGCAAGGGTCCCTACCCATTGCATGTGAGTGCCGATCTGGG
710049_003_Jurkat-ComLib -----GTAGGCAAGGGTCCCTACCCATTGCATGTGAGTGCCGATCTGGG
710026_005_Jurkat-ComLib -----GTGCA
710937_039_Jurkat-MainLib -----TCCTTGAAGATTATCGC-ACCCACAG-TACTGCGTTCAGTAATAAAT
709686_039_Jurkat-MainLib -----TCCTTGAAGATTATCGC-ACCCACAG-TACTGCGTTCAGTAATAAAT
711031_031_Jurkat-ComLib -----ATGAGCATGAAAACGATCGCCACCCGGGATAGTGGCATCAGTTA
709780_031_Jurkat-ComLib -----ATGAGCATGAAAACGATCGCCACCCGGGATAGTGGCATCAGTTA
711146_005_Jurkat-ComLib -----GTGCA
711152_029_Jurkat-MainLib -----GGGTCCAGCTTCTAAGCTTAGGTTTTCTGATGTCTTATTCCGCGC
710032_029_Jurkat-MainLib -----GGGTCCAGCTTCTAAGCTTAGGTTTTCTGATGTCTTATTCCGCGC
711176_027_Jurkat-MainLib -----ACGTATTGTAAACAGCCGCTAATCGTGCCTGGTGGGAGCGGCAGGT
710056_027_Jurkat-MainLib -----ACGTATTGTAAACAGCCGCTAATCGTGCCTGGTGGGAGCGGCAGGT
709691_006_Jurkat-MainLib -----ACGATACAGCCCTGTGAGATGAATCAAGTGAAACGGTGTATTAGG
710942_006_Jurkat-MainLib -----ACGATACAGCCCTGTGAGATGAATCAAGTGAAACGGTGTATTAGG
711068_028_Jurkat-ComLib -----ATGATC--ATATCTACAGCACCATTGTTATCAAGGCATGTTTCATG
709817_028_Jurkat-ComLib -----ATGATC--ATATCTACAGCACCATTGTTATCAAGGCATGTTTCATG
711129_039_Jurkat-MainLib -----GCTCGCTCGATATAGGCGTGTCCGATTTTTTTGGGACGTGCATGT
710009_039_Jurkat-MainLib -----GCTCGCTCGATATAGGCGTGTCCGATTTTTTTGGGACGTGCATGT
711312_044_Jurkat-ComLib -----GTGCA
711123_015_Jurkat-ComLib -----CACTCTAATCTAACAAATGTGGAAACCGAGTCAGGTAATAAGAA
710003_015_Jurkat-ComLib -----CACTCTAATCTAACAAATGTGGAAACCGAGTCAGGTAATAAGAA
709695_022_Jurkat-MainLib -----GTGCA
711091_026_Jurkat-ComLib -----TCATTTTCATATATATTTGGCAATCCGTACGAGGATATTGCTGCA
709840_026_Jurkat-ComLib -----TCATTTTCATATATATTTGGCAATCCGTACGAGGATATTGCTGCA
711036_047_Jurkat-ComLib -----TCGTATACACTAGGGGTTCTGACTGATGCCGTTGCAGCTGATGTA
711246_021_Jurkat-MainLib -----GAACTGAGAGAAAGGGCAAAGGTACGT-TATGTTATTCCTGCAATA
710124_021_Jurkat-MainLib -----GAACTGAGAGAAAGGGCAAAGGTACGT-TATGTTATTCCTGCAATA
711164_028_Jurkat-MainLib -----ACGCGTCTGGTATGATAGTCGTGCTATAAATAATGATGTTCTGG

```

1.....10.....20.....30.....40.....50.....60.....70.....80.....90.....

```

10044_028_Jurkat-MainLib-----ACGGCTGTGGTATGATAGTCTGTGCTATAAAATATGTAGTTCTCGG-----
709682_023_Jurkat-MainLib-----GTTAGTTCCAAGGACATTTCCCTTACGTCCA-GATACTCATTCCGTT-----
710933_023_Jurkat-MainLib-----GTTAGTTCCAAGGACATTTCCCTTACGTCCA-GATACTCATTCCGTT-----
711140_030_Jurkat-MainLib-----GTACTTCTATAGAGGTGTAGCTAACGTCTACGATATTCACGTAGA-----
710020_030_Jurkat-MainLib-----GTACTTCTATAGAGGTGTAGCTAACGTCTACGATATTCACGTAGA-----
708266_044_Jurkat-ComLib-----GTGCA-----
709705_013_Jurkat-MainLib-----GGAATGCGTTCGGGTGTAATTGATACAAATTGGTCCGTCACCTTA-----
710956_013_Jurkat-MainLib-----GGAATGCGTTCGGGTGTAATTGATACAAATTGGTCCGTCACCTTA-----
711126_023_Jurkat-ComLib-----TTGCGCATCCTAGGGAACTAGCGACAAATTTGTTAGTCCGCTGCT-----
710006_023_Jurkat-ComLib-----TTGCGCATCCTAGGGAACTAGCGACAAATTTGTTAGTCCGCTGCT-----
711229_006_Jurkat-MainLib-----ACCTCCGGCTCAGTTGATATGTGTAGAGTTTGTAGTCTGTAGAAT-----
710107_006_Jurkat-MainLib-----ACCTCCGGCTCAGTTGATATGTGTAGAGTTTGTAGTCTGTAGAAT-----
711043_030_Jurkat-ComLib-----ATAAGCGCATAAGTGAATAATGT-TACGTTTTAGTTCTCTCGGAATA-----
709792_030_Jurkat-ComLib-----ATAAGCGCATAAGTGAATAATGT-TACGTTTTAGTTCTCTCGGAATA-----
710951_046_Jurkat-MainLib-----GAGTAATTCAGTAGCGGACACAATTTAGACTCATTATAATTCTCA-----
709700_046_Jurkat-MainLib-----GAGTAATTCAGTAGCGGACACAATTTAGACTCATTATAATTCTCA-----
711114_024_Jurkat-ComLib-----GCAGTAGC-----
708246_013_Jurkat-MainLib-----CACCCCTCCGGCTCCCAGCGCAGTAGGTTGCAGCGCCACCCTCGGC-----
709994_024_Jurkat-ComLib-----GCAGTAGC-----
710949_038_Jurkat-MainLib-----TTGTTCAATGCGGT-TAAACATTCAGGTTATACGGTGGGCGTTTAA-----
709698_038_Jurkat-MainLib-----TTGTTCAATGCGGT-TAAACATTCAGGTTATACGGTGGGCGTTTAA-----
711236_030_Jurkat-MainLib-----ACCTCAAATAGAGTGTGATCAAAATGGGTGAGAAA-----GGTGTTCGGG-----
710936_031_Jurkat-MainLib-----TCGCGGGTCCAGTAGTTT-TAATCAGTATAGTTATAGGGGTGCCGT-----
709685_031_Jurkat-MainLib-----TCGCGGGTCCAGTAGTTT-TAATCAGTATAGTTATAGGGGTGCCGT-----
708229_047_Jurkat-MainLib-----CTAG-GTATGTGATAACTGGTCTCAGTGCATTAATCAATCAGATG-----
711275_047_Jurkat-MainLib-----CTAG-GTATGTGATAACTGGTCTCAGTGCATTAATCAATCAGATG-----
711175_027_Jurkat-MainLib-----GCGACC GTGAGTGGTAA-TGTTACAGATTTATAAATTA-TGTTGTA-----
710055_027_Jurkat-MainLib-----GCGACC GTGAGTGGTAA-TGTTACAGATTTATAAATTA-TGTTGTA-----
711057_037_Jurkat-ComLib-----TCATAC-GGATCGTACGGTTAACAGCATTAGTGAAGAGAGTACCC-----
709806_037_Jurkat-ComLib-----TCATAC-GGATCGTACGGTTAACAGCATTAGTGAAGAGAGTACCC-----
708283_018_Jurkat-ComLib-----ATAA-CGCTCTCAGGTATACCAATATGTGTGTTAGGCAATCGCA-----
711329_018_Jurkat-ComLib-----ATAA-CGCTCTCAGGTATACCAATATGTGTGTTAGGCAATCGCA-----
711234_022_Jurkat-MainLib-----GCATAGTGCTCAATGTGTTACCACGGTGC-TAGTAAGCAT-TCGCAA-----
710112_022_Jurkat-MainLib-----GCATAGTGCTCAATGTGTTACCACGGTGC-TAGTAAGCAT-TCGCAA-----
711249_037_Jurkat-MainLib-----AGGTTCAATCAGTCTCCCTAGTTGAGAGAATACGT-TCGGAATTC-----
710127_037_Jurkat-MainLib-----AAGGCTCATTCTGTGCCCCCGTTTACAGAATACTGTGTTAAATTCCTATCGGTGTGTCGTCGTGTT-----
709718_020_Jurkat-MainLib-----TGTCCTTACGTTCCGACCCCTTAAGT-----GGTCCGTCGACCCAGATGCT-----
710969_020_Jurkat-MainLib-----TGTCCTTACGTTCCGACCCCTTAAGT-----GGTCCGTCGACCCAGATGCT-----
711103_025_Jurkat-ComLib-----CATA-GTTCGAAGTCTACTGTCAA-----GGTCCCGCGTGCCCGCAGCCAG-----
708240_038_Jurkat-MainLib-----TGCGTA-GTAAACATCTTTACTTGTT-CAGGCTAGTGATCAGTCCCT-----
711286_038_Jurkat-MainLib-----TGCGTA-GTAAACATCTTTACTTGTT-CAGGCTAGTGATCAGTCCCT-----
711172_011_Jurkat-ComLib-----TGCGTC-TTAAAGAGCCCAAATGGTATGGGTAAATGATACCTCTG-----
710052_011_Jurkat-ComLib-----TGCGTC-TTAAAGAGCCCAAATGGTATGGGTAAATGATACCTCTG-----
710926_040_Jurkat-MainLib-----AAATTTGGCGATTAATATGATGAGTGTGTGCAGCCGGCGATTAC-----
709675_040_Jurkat-MainLib-----AAATTTGGCGATTAATATGATGAGTGTGTGCAGCCGGCGATTAC-----
711178_035_Jurkat-MainLib-----GTGTGGGC-----
711173_019_Jurkat-ComLib-----GTATCGAAAGGTGTGTGCCGCGAGTAGAATTTAGCGTTATTGAAGT-----
710053_019_Jurkat-ComLib-----GTATCGAAAGGTGTGTGCCGCGAGTAGAATTTAGCGTTATTGAAGT-----

```



```

10058_035_Jurkat-MainLib -----GTGTGGGC-----
710998_034_Jurkat-MainLib -----GGACATACCATCCTACTATTGTATGCAGTGTGCCCCGTGGATT-----
709747_034_Jurkat-MainLib -----GGACATACCATCCTACTATTGTATGCAGTGTGCCCCGTGGATT-----
711154_037_Jurkat-MainLib -----CTAGACACATCAGCGTATT-TTGATTACACTGGTTTTGATTTGGTG-----
710034_037_Jurkat-MainLib -----CTAGACACATCAGCGTATT-TTGATTACACTGGTTTTGATTTGGTG-----
711156_045_Jurkat-MainLib -----GTCCGACATTGCAGCTTAAC-TTATGTTCTCTATGTTTG--TGAGCGC-----
711128_031_Jurkat-MainLib -----TTAGGG--GCTGGGGCATTTAGC-GACACTGTGGCTGTGTATTGTGTA-----
710008_031_Jurkat-MainLib -----TTAGGG--GCTGGGGCATTTAGC-GACACTGTGGCTGTGTATTGTGTA-----
711107_041_Jurkat-ComLib -----ATTTAAGCCTACCCTAGTATTTTGAAGAAATTGTTG-TGTGGATT-----
709856_041_Jurkat-ComLib -----ATTTAAGCCTACCCTAGTATTTTGAAGAAATTGTTG-TGTGGATT-----
708234_014_Jurkat-MainLib -----CGTGATTTGGTGCGGTAAACGGGCAGACTAGGTTTTGAGGAGAAAC-----
711280_014_Jurkat-MainLib -----CGTGATTTGGTGCGGTAAACGGGCAGACTAGGTTTTGAGGAGAAAC-----
709669_016_Jurkat-MainLib -----CGCGTTTTGGCGG--AACGCTAGAAATATGTTAACGGATAAATCTAG-----
7110920_016_Jurkat-MainLib -----CGCGTTTTGGCGG--AACGCTAGAAATATGTTAACGGATAAATCTAG-----
709706_021_Jurkat-MainLib -----GGCCGTCCTGGTTAAATTAGGCATTAATAACAGTGTTTAGGTATTGT-----
7110957_021_Jurkat-MainLib -----GGCCGTCCTGGTTAAATTAGGCATTAATAACAGTGTTTAGGTATTGT-----
711110_008_Jurkat-ComLib -----CCGTATT--TTAATTATGAATTTA-TAAAAAGTTGGTATAATTA-----
709990_008_Jurkat-ComLib -----CCGTATT--TTAATTATGAATTTA-TAAAAAGTTGGTATAATTA-----
711181_002_Jurkat-ComLib -----GTTGGGACTATTTTACGGAT--AATTCATAGTTTGCAACGTTTCGTG-----
710061_002_Jurkat-ComLib -----GTTGGGACTATTTTACGGAT--AATTCATAGTTTGCAACGTTTCGTG-----
711215_048_Jurkat-MainLib -----TAAAGTTCTTGTAACTACTCAGCCATGTGAAGCGTAGAATTTGA-----
710093_048_Jurkat-MainLib -----TAAAGTTCTTGTAACTACTCAGCCATGTGAAGCGTAGAATTTGA-----
709729_011_Jurkat-MainLib -----GCCATTTTAAG-GTCTTGTGTTTACTAGCTCCGTTTATGAGGCT-----
710980_011_Jurkat-MainLib -----GCCATTTTAAG-GTCTTGTGTTTACTAGCTCCGTTTATGAGGCT-----
711202_033_Jurkat-MainLib -----CAATTCCATTCAGATGTCATGATCTTGTACTAG-TCCGTTCAACG-----
710082_033_Jurkat-MainLib -----CAATTCCATTCAGATGTCATGATCTTGTACTAG-TCCGTTCAACG-----
709679_007_Jurkat-MainLib -----GGCGCCTCCTACGTTCAATAAACCATGTGCGCTCTAATTTTGTGTTG-----
710930_007_Jurkat-MainLib -----GGCGCCTCCTACGTTCAATAAACCATGTGCGCTCTAATTTTGTGTTG-----
711203_041_Jurkat-MainLib -----CATCGCGTCTCTTAACTACTGTCTTCTTCTATTTTGGCAATG-----
710083_041_Jurkat-MainLib -----CATCGCGTCTCTTAACTACTGTCTTCTTCTATTTTGGCAATG-----
711142_038_Jurkat-MainLib -----CGGCAATCGCCAAATG-ACAAAGGTAGCTTTTTTTTTAG---TGTTTTAA-----
710022_038_Jurkat-MainLib -----CGGCAATCGCCAAATG-ACAAAGGTAGCTTTTTTTTTAG---TGTTTTAA-----
708242_046_Jurkat-ComLib -----ACTCGACTATGGACTACGGTAAACATTTAGTTTGGACCATCTCTCA-----
711288_046_Jurkat-ComLib -----ACTCGACTATGGACTACGGTAAACATTTAGTTTGGACCATCTCTCA-----
709730_019_Jurkat-MainLib -----GAGTGGTCAGGGATAGTCGGCGGATCTCTGGGGTGGGTTTGCCA-----
710981_019_Jurkat-MainLib -----GAGTGGTCAGGGATAGTCGGCGGATCTCTGGGGTGGGTTTGCCA-----
711217_007_Jurkat-MainLib -----GGGCGGG-----
709739_002_Jurkat-MainLib -----TCCCACACTGTGCGGGGGGAACCTGGGTTGGATTAATCCTGCATC-----
710990_002_Jurkat-MainLib -----TCCCACACTGTGCGGGGGGAACCTGGGTTGGATTAATCCTGCATC-----
710923_032_Jurkat-MainLib -----ACAGTACGGAGTGTATATAAGGGTGGCGGT-CCTAGGCGGGATCC-----
709672_032_Jurkat-MainLib -----ACAGTACGGAGTGTATATAAGGGTGGCGGT-CCTAGGCGGGATCC-----
710962_037_Jurkat-MainLib -----TATGGTGGATGTGGGTGGGGCCGTACCTAGGTGGGACGGTCCGGTG-----
709711_037_Jurkat-MainLib -----TATGGTGGATGTGGGTGGGGCCGTACCTAGGTGGGACGGTCCGGTG-----
710939_047_Jurkat-MainLib -----TCGGTAAGGGTCGGGGATGCTACAACCTGTTTAAACGACCCGTCCA-----
709688_047_Jurkat-MainLib -----TCGGTAAGGGTCGGGGATGCTACAACCTGTTTAAACGACCCGTCCA-----
711035_047_Jurkat-ComLib -----TCGGTAAGGGTCGGGGATGCTACAACCTGTTTAAACGACCCGTCCA-----
710950_038_Jurkat-MainLib -----GTAAGCAAGGG--GGGGACGAATCAGACTTACCGCCAAATCTCCTGA-----
709699_038_Jurkat-MainLib -----GTAAGCAAGGG--GGGGACGAATCAGACTTACCGCCAAATCTCCTGA-----

```

1.....10.....20.....30.....40.....50.....60.....70.....80.....90.....

710995\_007\_Jurkat-MainLib -----GGG--CGGG-----  
710988\_043\_Jurkat-MainLib -----GGAGCGGACGATCCCTTACCGTGATCTTCGTATAATGTCCCTGTCA  
709737\_043\_Jurkat-MainLib -----GGAGCGGACGATCCCTTACCGTGATCTTCGTATAATGTCCCTGTCA  
709731\_019\_Jurkat-MainLib -----TTCGGGGGTGTGAAACTGTGAAAGGGTGACTTCTTCTAAGGCCGA  
710982\_019\_Jurkat-MainLib -----TTCGGGGGTGTGAAACTGTGAAAGGGTGACTTCTTCTAAGGCCGA  
709738\_002\_Jurkat-MainLib -----TTGCCGGTACTATCATGACCTGTTATAGTGAGGAC-----GAGATCGAGC  
710989\_002\_Jurkat-MainLib -----TTGCCGGTACTATCATGACCTGTTATAGTGAGGAC-----GAGATCGAGC  
709750\_001\_Jurkat-MainLib -----CGGTAGTATGCCTATG-TTAGGGTCTCTGTTATATTGAGACACAGG  
711001\_001\_Jurkat-MainLib -----CGGTAGTATGCCTATG-TTAGGGTCTCTGTTATATTGAGACACAGG  
711044\_030\_Jurkat-ComLib -----ATTTTCGGTCTCTTTGCTTATTGAGACCGA-ATCCGAACAGTCAC  
709793\_030\_Jurkat-ComLib -----ATTTTCGGTCTCTTTGCTTATTGAGACCGA-ATCCGAACAGTCAC  
711233\_022\_Jurkat-MainLib -----TTGAACTGACA-GTCCGGCGTAAACTGTGATTATG--CGTCGGTCTAC  
710111\_022\_Jurkat-MainLib -----TTGAACTGACA-GTCCGGCGTAAACTGTGATTATG--CGTCGGTCTAC  
711113\_024\_Jurkat-ComLib -----ATCCGCCCCAGTGTGTCCGACGGTCAAAATGATTCCTGGCGTGGG  
709993\_024\_Jurkat-ComLib -----ATCCGCCCCAGTGTGTCCGACGGTCAAAATGATTCCTGGCGTGGG  
711083\_043\_Jurkat-ComLib -----AATATAAATTTAGTCTCGAGACGATGATTCAGGCCGCTACA--CGGA  
709832\_043\_Jurkat-ComLib -----AATATAAATTTAGTCTCGAGACGATGATTCAGGCCGCTACA--CGGA  
711183\_010\_Jurkat-ComLib -----GAGAGGACCGAGT-TCAAAACGCCAAGTCAAGCTCCTCAGCCGG  
710063\_010\_Jurkat-ComLib -----TAGAGGACCGAGT-TCAAAACGCCAAGTCAAGCTCCTCAGCCGG  
710924\_032\_Jurkat-MainLib -----AAGCAACGTATAAAAATTTG--GCGGCGAAGTAACTGGGACGATTGGA  
709673\_032\_Jurkat-MainLib -----AAGCAACGTATAAAAATTTG--GCGGCGAAGTAACTGGGACGATTGGA  
709742\_018\_Jurkat-MainLib -----TGTCAAAGTAGAGAATACG-TCAAATAAAGCGATCTTGAAGTGAAC  
710993\_018\_Jurkat-MainLib -----TGTCAAAGTAGAGAATACG-TCAAATAAAGCGATCTTGAAGTGAAC  
711189\_034\_Jurkat-MainLib -----ACGTACAATATTCG--GGCCCAAGCAATAGTTAATCCTTCAGCATT  
710069\_034\_Jurkat-MainLib -----ACGTACAATATTCG--GGCCCAAGCAATAGTTAATCCTTCAGCATT  
708245\_013\_/Jurkat-MainLib -----ACAAAGTCGTCAAATGATTCGGGCCCGCCATGTTTTAGAGTC  
711291\_013\_Jurkat-MainLib -----ACAAAGTCGTCAAATGATTCGGGCCCGCCATGTTTTAGAGTC  
711210\_024\_Jurkat-MainLib -----G-----  
711212\_032\_Jurkat-MainLib -----ACTGGCTGTTAAACTCAAGTGTGAGAAAATTCGATCAATCAA  
710090\_032\_Jurkat-MainLib -----ACTGGCTGTTAAACTCAAGTGTGAGAAAATTCGATCAATCAA  
711127\_031\_Jurkat-MainLib -----CCTCAAACCTACA--TTTGAGAATCTCGGGCCTATCACATTTAACTG  
710007\_031\_Jurkat-MainLib -----CCTCAAACCTACA--TTTGAGAATCTCGGGCCTATCACATTTAACTG  
708288\_034\_Jurkat-MainLib -----TCAGGTCAGAGTG  
711334\_034\_Jurkat-MainLib -----TCAGGTCAGAGTG  
711069\_036\_Jurkat-ComLib -----GAACCTGGGGCAACTACACTCATTGACATCAGCTCAGGGTCGAG  
709818\_036\_Jurkat-ComLib -----GAACCTGGGGCAACTACACTCATTGACATCAGCTCAGGGTCGAG  
711242\_005\_Jurkat-MainLib -----CATTCTTCTACTTTAGG--ATCGCCCCAGA-TCGTGGGCAGACTCCAC  
710120\_005\_Jurkat-MainLib -----CATTCTTCTACTTTAGG--ATCGCCCCAGA-TCGTGGGCAGACTCCAC  
711137\_022\_Jurkat-ComLib -----GAATTTCACTAAAAGCCATGCCATTACAATAGTAAATACGGTCCG  
708295\_017\_Jurkat-ComLib -----CAGACTTAAAAGAAAT-TCGCCAGAGAAAGCATACACACCCCCAC  
711224\_031\_Jurkat-MainLib -----AGTAAACTCCCTAAGCTGCCAAAAAACCTCGGCCATGTGCCCA  
710102\_031\_Jurkat-MainLib -----AGTAAACTCCCTAAGCTGCCAAAAAACCTCGGCCATGTGCCCA  
711248\_029\_Jurkat-MainLib -----AATGGAGGAAGGTTGAAAAGCTACAGAAATAACACGCAGGCTAAC  
710126\_029\_Jurkat-MainLib -----AATGGAGGAAGGTTGAAAAGCTACAGAAATAACACGCAGGCTAAC  
711341\_017\_Jurkat-ComLib -----CCTGACTACCGAAGACCGTTAAAGAACGCGGGGAGGACCCCCAA  
711122\_007\_Jurkat-ComLib -----CGTACTAGCTAACAAACAACAACTCACACCCCCATATCTTTTCG  
710002\_007\_Jurkat-ComLib -----CCTACTACCTAACTAACAAACAACTCACACCCCCATATCTGCTGG  
711166\_036\_Jurkat-MainLib -----TACCGCCCTATAACTTAGCGAAGCAACAGTAGAGTTAACACATA

1.....10.....20.....30.....40.....50.....60.....70.....80.....90.....



710046\_036\_Jurkat-MainLib -----TACCGCCCTATAACTTAGCGAAGCAACAAGTAGAGTTAACACATA-----  
711084\_043\_Jurkat-ComLib -----GGATCTTAGCTTAACTTCCCTCATAGTTCACACAGCATTTCATCTC-----  
709833\_043\_Jurkat-ComLib -----GGATCTTAGCTTAACTTCCCTCATAGTTCACACAGCATTTCATCTC-----  
710964\_045\_Jurkat-MainLib -----AGGTCTTAGTCTAAAGCCTATTATAGGTTTCCCAAAGTACTCTCA-----  
709713\_045\_Jurkat-MainLib -----AGGTCTTAGTCTAAAGCCTATTATAGGTTTCCCAAAGTACTCTCA-----  
708218\_048\_Jurkat-ComLib -----GTGGTAGTCCTAAG---AATAAACATGCGCAGACTACTTCGCCCTCTG-----  
711223\_031\_Jurkat-MainLib -----GTTTCCAAGGCAGACCGTAAACCCCTGG--AGTAACTCAGAGGGCC-----  
710101\_031\_Jurkat-MainLib -----GTTTCCAAGGCAGACCGTAAACCCCTGG--AGTAACTCAGAGGGCC-----  
708269\_011\_Jurkat-MainLib -----GCCAACCCCTAAAGTACAGCCACGGT-AGTATTTTCAGATCTTTCTG-----  
711315\_011\_Jurkat-MainLib -----GCCAACCCCTAAAGTACAGCCACGGT-AGTATTTTCAGATCTTTCTG-----  
711171\_011\_Jurkat-ComLib -----GGTACGAGCTTAAACGCCCTCGGATAATCGCTCAGGCCAACAAAGGTT-----  
710051\_011\_Jurkat-ComLib -----GGTACGAGCTTAAACGCCCTCGGATAATCGCTCAGGCCAACAAAGGTT-----  
711227\_047\_Jurkat-MainLib -----CGCGCTACTA-CACTTATCATCTGGAA-TTAAATAGACCCCTGCCCC-----  
710105\_047\_Jurkat-MainLib -----CGCGCTACTA-CACTTATCATCTGGAA-TTAAATAGACCCCTGCCCC-----  
708241\_046\_Jurkat-MainLib -----ACTC-CTCTCGTAAT-TGAAA-TACTTCTGCCCTTCTCGCAGCACCT-----  
711287\_046\_Jurkat-MainLib -----ACTC-CTCTCGTAAT-TGAAA-TACTTCTGCCCTTCTCGCAGCACCT-----  
711238\_038\_Jurkat-MainLib -----TGAAACTATCTTTTATAATAATGGAATTCAGAGGCCCTACTCTGA-----  
710116\_038\_Jurkat-MainLib -----TGAAACTATCTTTTATAATAATGGAATTCAGAGGCCCTACTCTGA-----  
711048\_046\_Jurkat-ComLib -----AGCGGTGGGATTCTCCACCTATTATAGT---AGGCATTCAAGTGCCAC-----  
709797\_046\_Jurkat-ComLib -----AGCGGTGGGATTCTCCACCTATTATAGT---AGGCATTCAAGTGCCAC-----  
708254\_045\_Jurkat-ComLib -----CTGGGTTATCCACCCACTTAAATTTAAGGCC TTCACAGATTAGCT-----  
711300\_045\_Jurkat-ComLib -----CTGGGTTATCCACCCACTTAAATTTAAGGCC TTCACAGATTAGCT-----  
711007\_025\_Jurkat-MainLib -----GTGGTACTCGTCTCTCTTTATATACTGTAAGTCCTTACGAGAGTT-----  
709756\_025\_Jurkat-MainLib -----GTGGTACTCGTCTCTCTTTATATACTGTAAGTCCTTACGAGAGTT-----  
711143\_046\_Jurkat-MainLib -----CTTGGTGCTCACTCCCTTTACGT-CTTCGGTCAGTTGTGAGGTGC-----  
710023\_046\_Jurkat-MainLib -----CTTGGTGCTCACTCCCTTTACGT-CTTCGGTCAGTTGTGAGGTGC-----  
708257\_012\_Jurkat-MainLib -----GATCCGC-TCAGTCATCGTTCTTCGGTTTTGTTTCAAGTTTCTCA-----  
711303\_012\_Jurkat-MainLib -----GATCCGC-TCAGTCATCGTTCTTCGGTTTTGTTTCAAGTTTCTCA-----  
711184\_010\_Jurkat-ComLib -----TGCTC-TCCTCGTCAATTGGTAGTTAATTCATA-GTTACTAAAGC-----  
710064\_010\_Jurkat-ComLib -----TGCTC-TCCTCGTCAATTGGTAGTTAATTCATA-GTTACTAAAGC-----  
711124\_015\_Jurkat-ComLib -----GGTTCAT-CTCCTCGCCTTAGTCTTAGCTAACTCGCG-ATCCCATAT-----  
710004\_015\_Jurkat-ComLib -----GGTTCAT-CTCCTCGCCTTAGTCTTAGCTAACTCGCG-ATCCCATAT-----  
711244\_013\_Jurkat-MainLib -----AGATATTTTTGTAATCAA-GTTG-TAATAGAGACCCTTTATGGGTCC-----  
710122\_013\_Jurkat-MainLib -----AGATATTTTTGTAATCAA-GTTG-TAATAGAGACCCTTTATGGGTCC-----  
710948\_030\_Jurkat-MainLib -----GATATCGTGAATGTTTAAAGTAATGGG-ATTAATAACAGAGAAGCGT-----  
709697\_030\_Jurkat-MainLib -----GATATCGTGAATGTTTAAAGTAATGGG-ATTAATAACAGAGAAGCGT-----  
710997\_034\_Jurkat-MainLib -----GGGCGGCAGGGGTTTCAGTAATGGG-AGTGCCGA-AGCGAAGCGAGT-----  
709746\_034\_Jurkat-MainLib -----GGGCGGCAGGGGTTTCAGTAATGGG-AGTGCCGA-AGCGAAGCGAGT-----  
711187\_026\_Jurkat-MainLib -----TTTGGTCTTCTCGTTGTAAAAGCTGATCCTCTCAATAATCGTATG-----  
710067\_026\_Jurkat-MainLib -----TTTGGTCTTCTCGTTGTAAAAGCTGATCCTCTCAATAATCGTATG-----  
711119\_048\_Jurkat-MainLib -----TCTGGTCTCCGGTCAAATATG-TGGTATCCTCAATCTTCAATGTAG-----  
711092\_026\_Jurkat-ComLib -----ATTTAACACATTCATAACTTG-GTCAGCCGCTCTAACAGCTGTCAA-----  
709841\_026\_Jurkat-ComLib -----ATTTAACACATTCATAACTTG-GTCAGCCGCTCTAACAGCTGTCAA-----

1.....10.....20.....30.....40.....50.....60.....70.....80.....90.....
